# Supplementary material
Source: PubMed Central journal article supplement (PMC3141225)
Supplement: NIHMS299505-supplement-01.pdf [file NIHMS299505-supplement-01.pdf]

**Table S1.** List of observed vs expected ORs and accompanying 95% CIs for use of any medication, by state

| State | Observed vs expected OR | 95% CI    |
|-------|-------------------------|-----------|
| AL    | <b>0.80</b>             | 0.66-0.97 |
| AK    | 0.78                    | 0.52-1.17 |
| AR    | 0.94                    | 0.55-1.59 |
| CA    | 0.97                    | 0.87-1.09 |
| CO    | 0.78                    | 0.60-1.01 |
| CT    | <b>1.57</b>             | 1.23-2.01 |
| DC    | 1.05                    | 0.80-1.38 |
| FL    | <b>1.65</b>             | 1.40-1.94 |
| GA    | 0.96                    | 0.84-1.11 |
| HI    | 1.07                    | 0.81-1.40 |
| ID    | 0.74                    | 0.53-1.03 |
| IL    | <b>1.16</b>             | 1.02-1.32 |
| IN    | <b>0.83</b>             | 0.72-0.97 |
| IA    | 1.24                    | 0.96-1.61 |
| KS    | <b>0.58</b>             | 0.46-0.75 |
| LA    | 0.94                    | 0.80-1.12 |
| ME    | 0.95                    | 0.69-1.29 |
| MD    | 1.13                    | 0.93-1.38 |
| MA    | 1.17                    | 0.97-1.42 |
| MI    | <b>1.25</b>             | 1.08-1.45 |
| MN    | 1.14                    | 0.89-1.47 |
| MS    | <b>0.66</b>             | 0.56-0.77 |
| MO    | 1.02                    | 0.87-1.18 |
| MT    | 0.73                    | 0.50-1.07 |
| NE    | 0.84                    | 0.62-1.14 |
| NV    | 1.03                    | 0.59-1.81 |
| NH    | 1.40                    | 0.92-2.13 |
| NJ    | <b>1.27</b>             | 1.07-1.50 |
| NM    | 0.82                    | 0.63-1.06 |
| NY    | 1.05                    | 0.93-1.18 |
| NC    | 1.08                    | 0.94-1.23 |
| ND    | 1.00                    | 0.66-1.51 |
| OH    | <b>1.18</b>             | 1.03-1.35 |
| OK    | 0.99                    | 0.57-1.73 |
| OR    | 1.20                    | 0.87-1.67 |
| PA    | <b>1.36</b>             | 1.12-1.66 |
| RI    | <b>1.52</b>             | 1.04-2.21 |
| SC    | 0.99                    | 0.85-1.15 |
| SD    | 0.72                    | 0.48-1.09 |
| TX    | <b>0.55</b>             | 0.48-0.62 |
| UT    | 1.06                    | 0.73-1.54 |
| VT    | 0.99                    | 0.68-1.44 |
| VA    | 1.02                    | 0.86-1.21 |
| WA    | 0.98                    | 0.80-1.22 |
| WV    | 1.20                    | 0.89-1.62 |
| WI    | 0.98                    | 0.82-1.17 |
| WY    | 0.95                    | 0.58-1.55 |

ORs in **bold** differ significantly from unity.
